# Supplementary material for: Cumulative mitochondrial activity correlates with ototoxin susceptibility in zebrafish mechanosensory hair cells
Source: eLife journal article supplement (doi:10.7554/elife.38062), 2018-12-31
Supplement: supp [file elife-38062-supp-v1.zip]

Archive with 12 entries (12 files):
- elife_poa_e38062_Figure_7_figure_supplement_2.pdf
- elife_poa_e38062_Figure_4_figure_supplement_1.pdf
- elife_poa_e38062_Figure_7_figure_supplement_3.pdf
- elife_poa_e38062_Figure_5_figure_supplement_1.pdf
- elife_poa_e38062_Video_2.avi
- elife_poa_e38062_Transparent_Reporting_File.docx
- elife_poa_e38062_Figure_7_figure_supplement_1.pdf
- elife_poa_e38062_Video_1.mp4
- elife_poa_e38062_Figure_7_figure_supplement_4.pdf
- elife_poa_e38062_Figure_8_figure_supplement_1.pdf
- elife_poa_e38062_Figure_4_figure_supplement_2.pdf
- elife_poa_e38062_Figure_1_figure_supplement_1.pdf
