# Supplementary figures and images for: Cumulative mitochondrial activity correlates with ototoxin susceptibility in zebrafish mechanosensory hair cells
Source: eLife journal article supplement (doi:10.7554/elife.38062), 2018-12-31

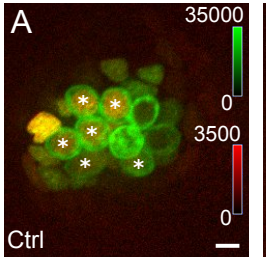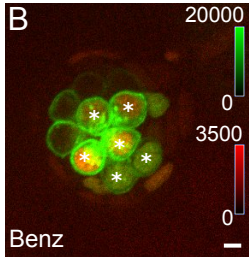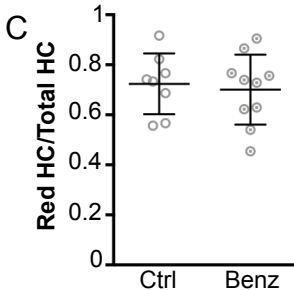

Supplement: supp [file elife-38062-supp-v1.zip]

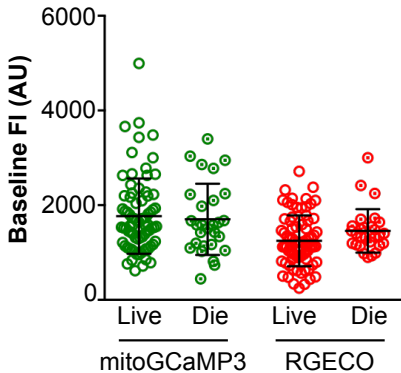

Supplement: supp [file elife-38062-supp-v1.zip]

Control

Orbital Shaker

Wildtype

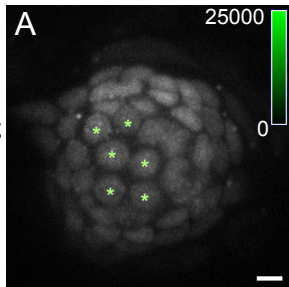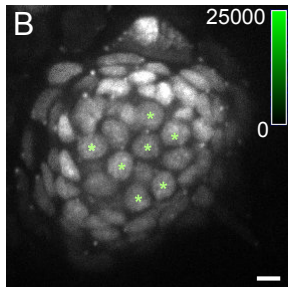

Mutant

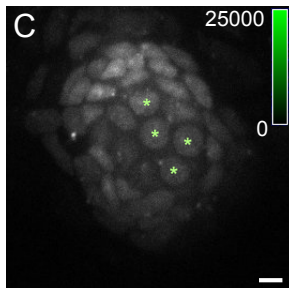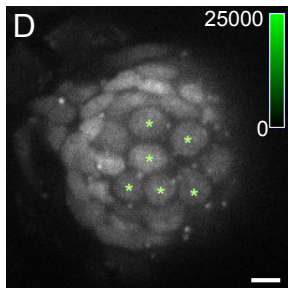

Supplement: supp [file elife-38062-supp-v1.zip]

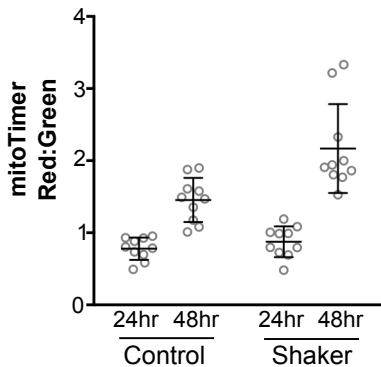

Supplement: supp [file elife-38062-supp-v1.zip]

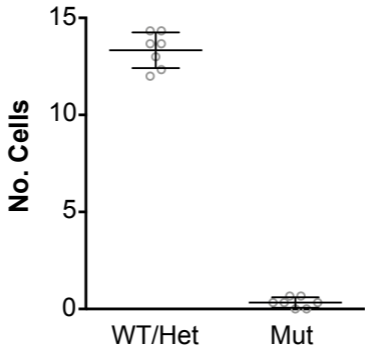

Supplement: supp [file elife-38062-supp-v1.zip › elife_poa_e38062_Figure_4_figure_supplement_1.pdf]

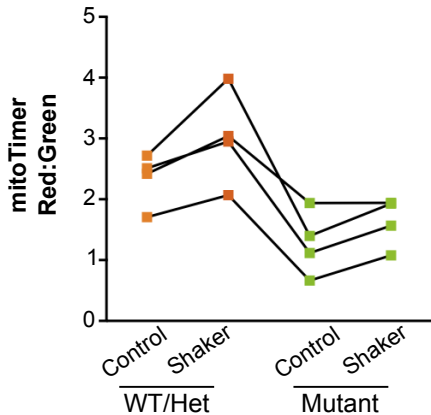

Supplement: supp [file elife-38062-supp-v1.zip › elife_poa_e38062_Figure_7_figure_supplement_1.pdf]

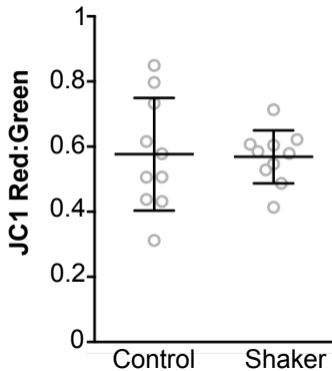

Supplement: supp [file elife-38062-supp-v1.zip › elife_poa_e38062_Figure_7_figure_supplement_4.pdf]

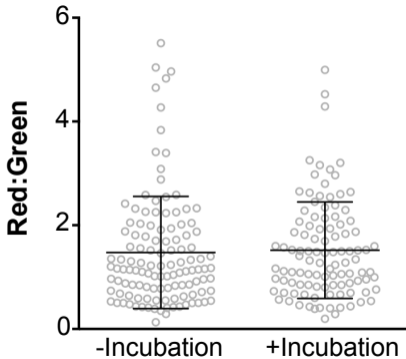

Supplement: supp [file elife-38062-supp-v1.zip › elife_poa_e38062_Figure_4_figure_supplement_2.pdf]

A

Lateral View

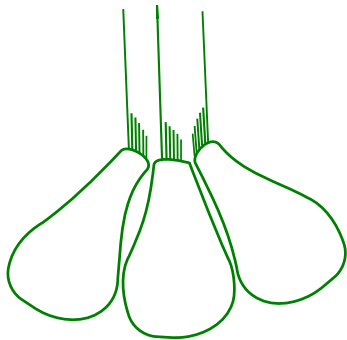

B

Dorsal View

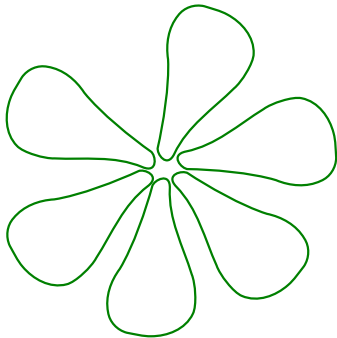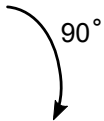

Supplement: supp [file elife-38062-supp-v1.zip › elife_poa_e38062_Figure_1_figure_supplement_1.pdf]
